# Supplementary material
Source: PubMed Central journal article supplement (PMC1831836)

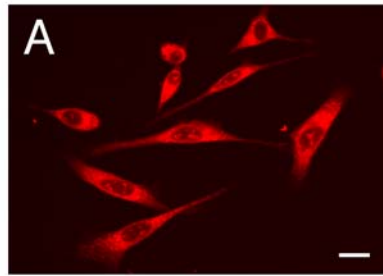

-

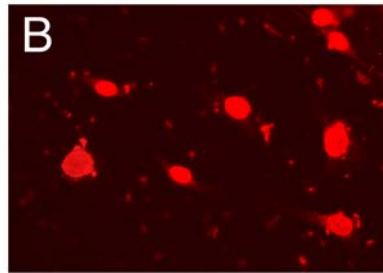

+  
importin- $\alpha$   
importin- $\beta$   
NTF2  
Ran

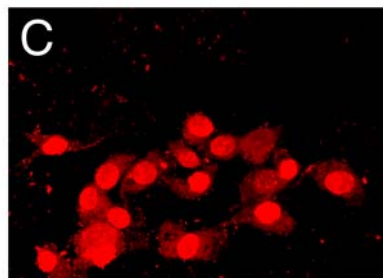

+  
importin- $\alpha$  647  
importin- $\beta$  647  
NTF2 647  
Ran 647

Supplement: NIHMS14918-supplement-FigureS1.pdf [file NIHMS14918-supplement-FigureS1.pdf]

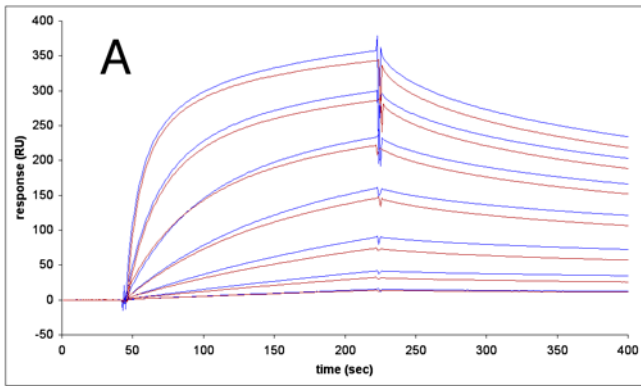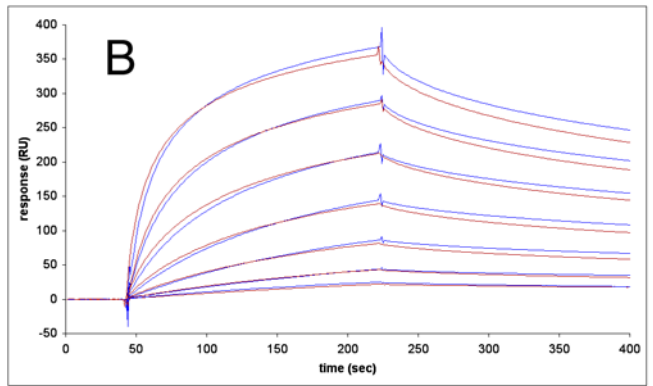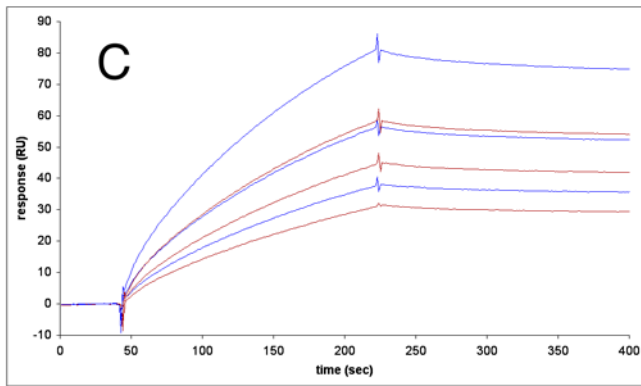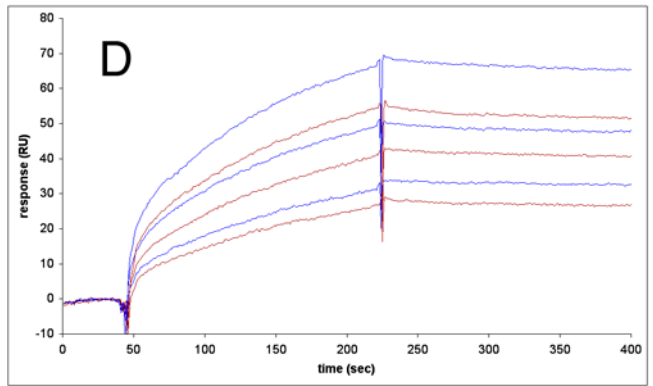

Supplement: NIHMS14918-supplement-FigureS2.pdf [file NIHMS14918-supplement-FigureS2.pdf]
